# Supplementary material
Source: PubMed Central journal article supplement (PMC1451240)
Supplement: JCI0626971sd.pdf [file JCI0626971sd.pdf]

Supplemental Table 1. Histological evaluations of mice

| Genotype | Sex | Pancreas                             |                           | Liver                      | Lung                       |
|----------|-----|--------------------------------------|---------------------------|----------------------------|----------------------------|
|          |     | Periinsular lymphocytic infiltration | Atrophy of acinar tissues | Lymphoid cell infiltration | Lymphoid cell infiltration |
| +/+      | F   | ++                                   | -                         | -                          | -                          |
| +/+      | F   | +                                    | -                         | -                          | -                          |
| +/+      | F   | ++                                   | -                         | -                          | -                          |
| +/+      | M   | +                                    | -                         | -                          | -                          |
| +/+      | M   | +                                    | -                         | +                          | -                          |
| +/+      | M   | +                                    | -                         | -                          | -                          |
| +/+      | M   | +                                    | -                         | -                          | -                          |
| +/-      | F   | +                                    | -                         | -                          | -                          |
| +/-      | F   | ++                                   | -                         | +                          | -                          |
| +/-      | F   | ++                                   | -                         | -                          | +                          |
| +/-      | M   | +                                    | -                         | -                          | -                          |
| +/-      | M   | +                                    | -                         | -                          | -                          |
| +/-      | M   | ++                                   | -                         | -                          | +                          |
| +/-      | M   | ++                                   | -                         | N.A.                       | -                          |
| +/-      | M   | -                                    | -                         | -                          | -                          |
| +/-      | M   | ++                                   | -                         | -                          | -                          |
| -/-      | F   | ++                                   | ++                        | +                          | ++                         |
| -/-      | F   | ++                                   | ++                        | +                          | ++                         |
| -/-      | F   | ++                                   | ++                        | +                          | ++                         |
| -/-      | F   | N.A.                                 | N.A.                      | +                          | ++                         |
| -/-      | F   | N.A.                                 | N.A.                      | +                          | +                          |
| -/-      | F   | +                                    | -                         | +                          | +                          |
| -/-      | F   | N.A.                                 | N.A.                      | +                          | ++                         |
| -/-      | F   | ++                                   | +                         | +                          | ++                         |
| -/-      | F   | ++                                   | -                         | +                          | ++                         |
| -/-      | F   | -                                    | -                         | +                          | ++                         |
| -/-      | F   | +                                    | ++                        | +                          | +                          |
| -/-      | F   | ++                                   | ++                        | +                          | ++                         |
| -/-      | M   | ++                                   | ++                        | +                          | ++                         |
| -/-      | M   | ++                                   | ++                        | +                          | ++                         |
| -/-      | M   | ++                                   | ++                        | +                          | ++                         |
| -/-      | M   | +                                    | -                         | +                          | ++                         |
| -/-      | M   | ++                                   | +                         | +                          | ++                         |
| -/-      | M   | ++                                   | ++                        | +                          | ++                         |
| -/-      | M   | ++                                   | ++                        | +                          | ++                         |
| -/-      | M   | ++                                   | ++                        | +                          | ++                         |
| -/-      | M   | +                                    | ++                        | -                          | +                          |
| -/-      | M   | ++                                   | +                         | +                          | ++                         |
| -/-      | M   | ++                                   | ++                        | +                          | ++                         |
| -/-      | M   | ++                                   | ++                        | +                          | ++                         |

Formalin-fixed tissue sections were subjected to H&E staining, and two pathologists independently evaluated the histology without being informed of the condition of each individual mouse. Histological evaluations were made 6 to 21 wks after birth. Mice backcrossed onto NOD mice for 6 to 9 generations were used.

N.A., not assessed.

++, severe; +, moderate; -, not remarkable.

Supplemental Table 2. Expression of tissue-specific genes from Aire-deficient NOD mouse thymus

| Genotype                                | Foxn1/Hprt | Ins/Hprt              | SP1/Hprt              | FABP/Hprt             | CRP/Hprt | GAD67/Hprt | PD1p/Hprt |
|-----------------------------------------|------------|-----------------------|-----------------------|-----------------------|----------|------------|-----------|
| +/+                                     | 1.86       | 2.83                  | 1.04                  | 0.78                  | 1.41     | 52.2       | 0.74      |
| -/-                                     | 1.65       | $9.77 \times 10^{-2}$ | $4.96 \times 10^{-3}$ | $3.49 \times 10^{-2}$ | 1.60     | 185        | 0.62      |
| Relative abundance<br>(Aire-KO/control) | 0.89       | 1/29.0                | 1/210                 | 1/22.5                | 1.13     | 3.54       | 0.85      |

Real-time PCR for *Foxn1* and peripheral tissue-specific genes was performed using total thymus RNAs from control and Aire-deficient NOD mice. The relative abundance of each gene was calculated as described in Table 1. Mice backcrossed onto NOD mice for 6 generations were used.

Supplemental Table 3. Serum auto-Abs against various organs detected with immuno-fluorescence

| Genotype | Pancreas | Stomach | Kidney | Liver |
|----------|----------|---------|--------|-------|
| +/+      | -        | -       | -      | -     |
| +/-      | -        | -       | -      | -     |
| +/-      | -        | -       | -      | -     |
| +/-      | -        | -       | -      | -     |
| +/-      | -        | -       | -      | -     |
| +/-      | -        | -       | -      | -     |
| -/-      | +        | ++      | +      | ++    |
| -/-      | ++       | ++      | +      | ++    |
| -/-      | ++       | +       | +      | ++    |
| -/-      | ++       | ++      | +      | ++    |
| -/-      | ++       | ++      | +      | +     |
| -/-      | +        | +       | +      | +     |
| -/-      | ++       | ++      | ++     | ++    |

Mouse serum was incubated with various organs obtained from Rag2-deficient mice, and reactivity was determined by immuno-fluorescence. Mice backcrossed onto NOD mice for 6 generations were used.

++, strongly positive; +, moderately positive; -, negative.

Supplemental Figure 1. Matsumoto M, et al

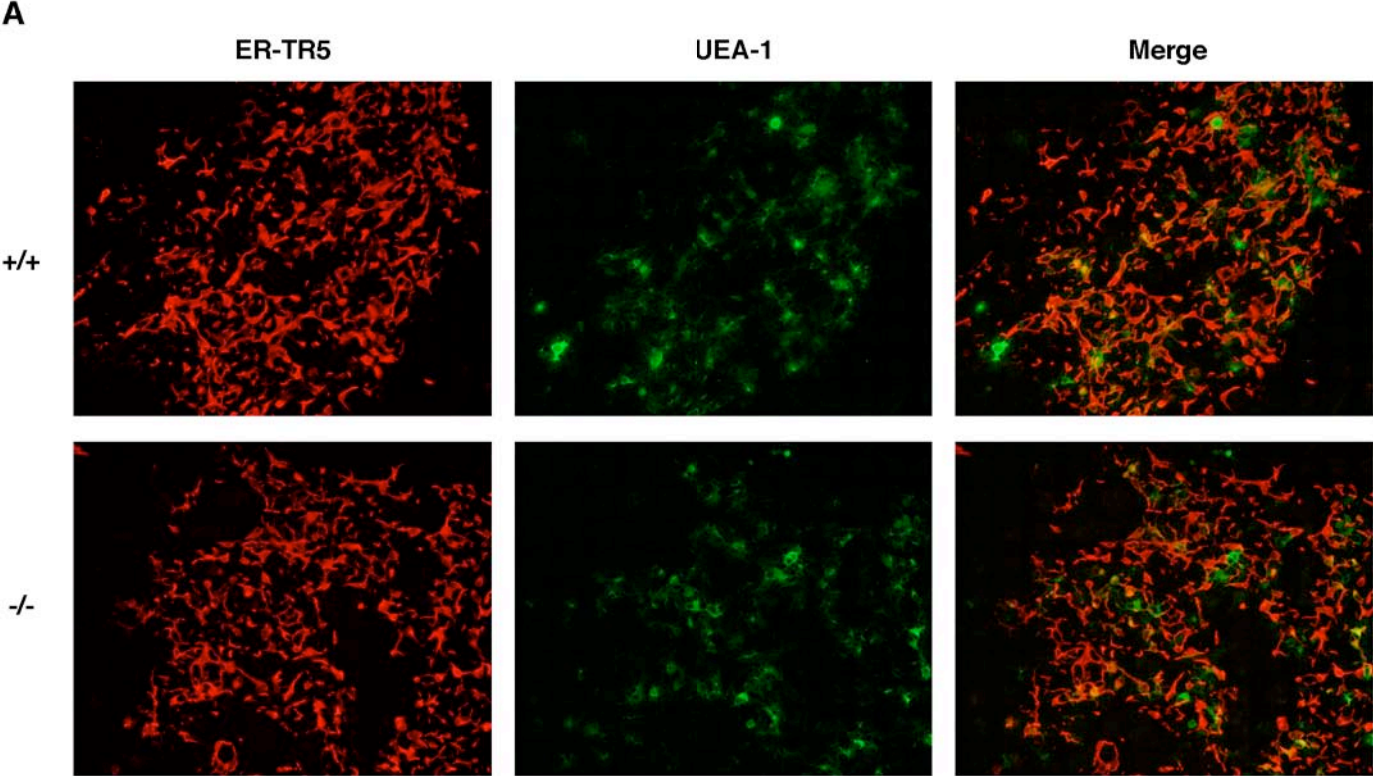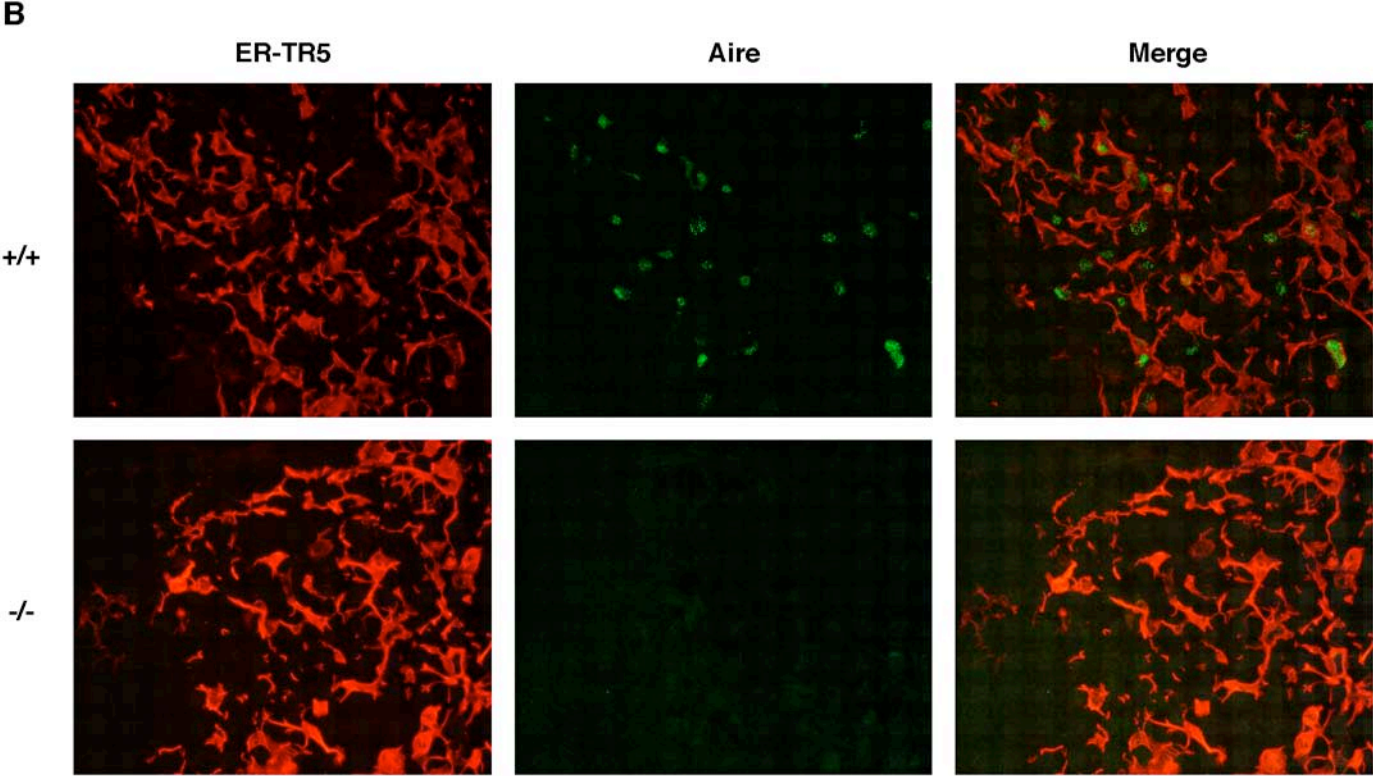

Supplemental Figure 2. Matsumoto M, et al

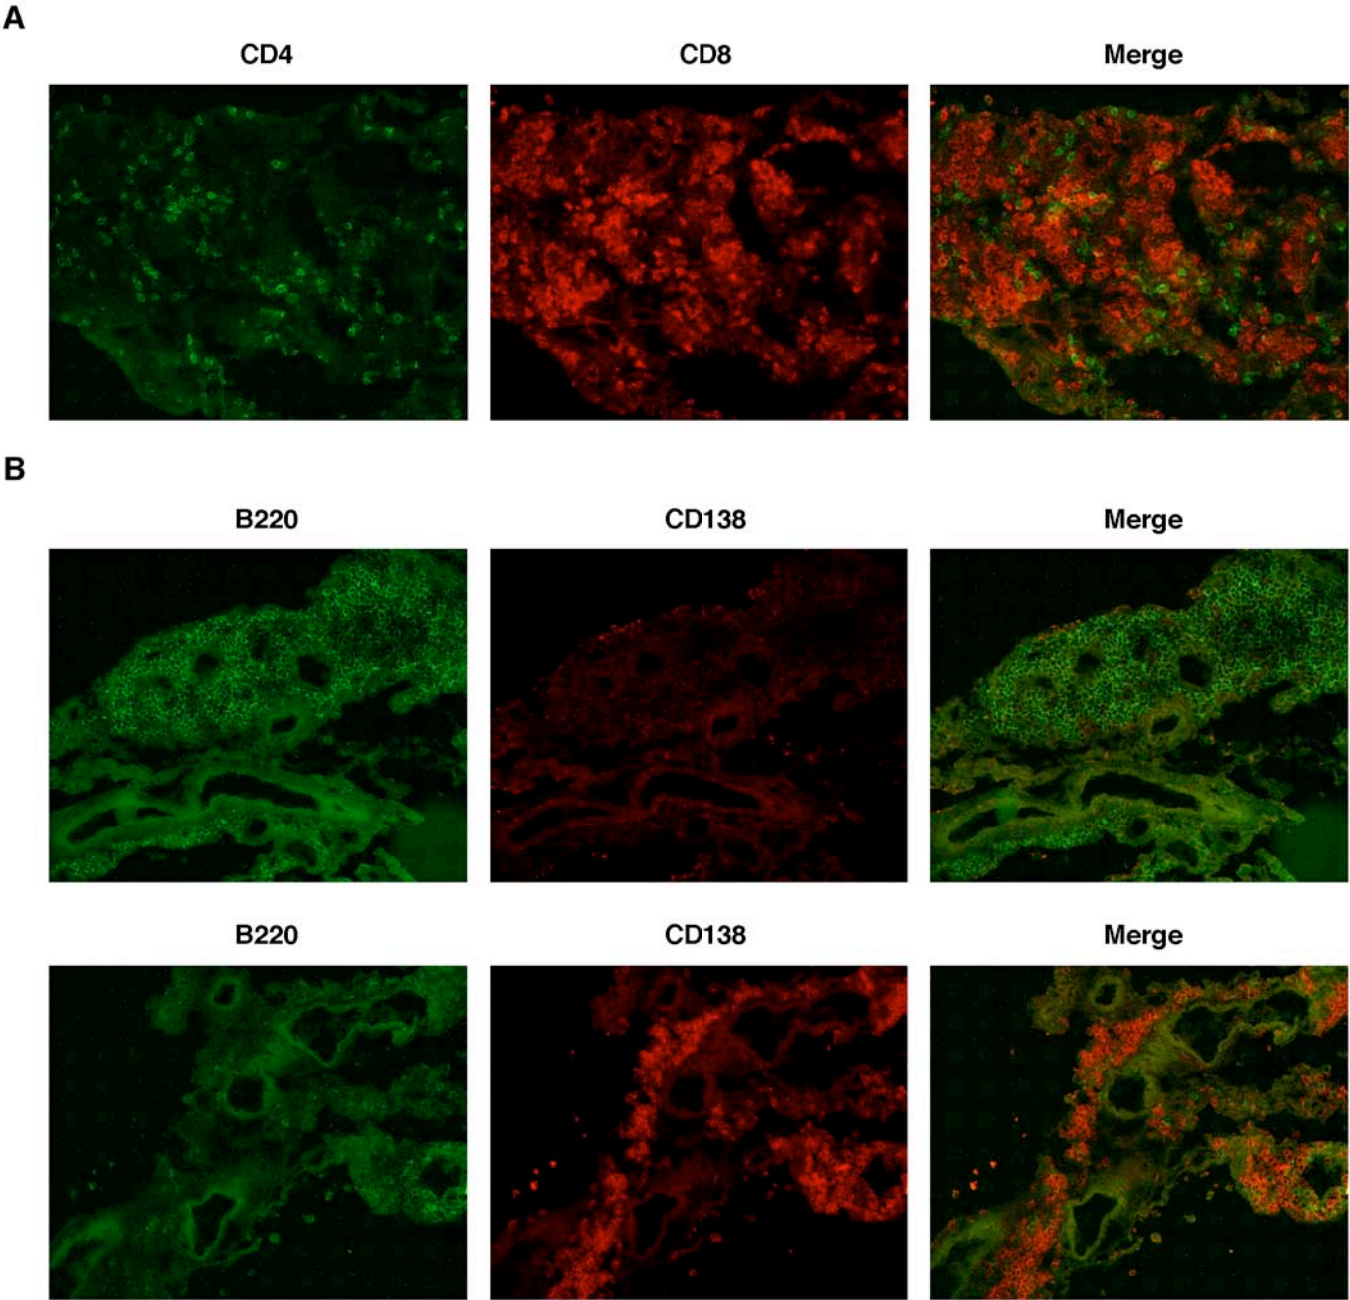

Supplemental Figure 3. Matsumoto M, et al

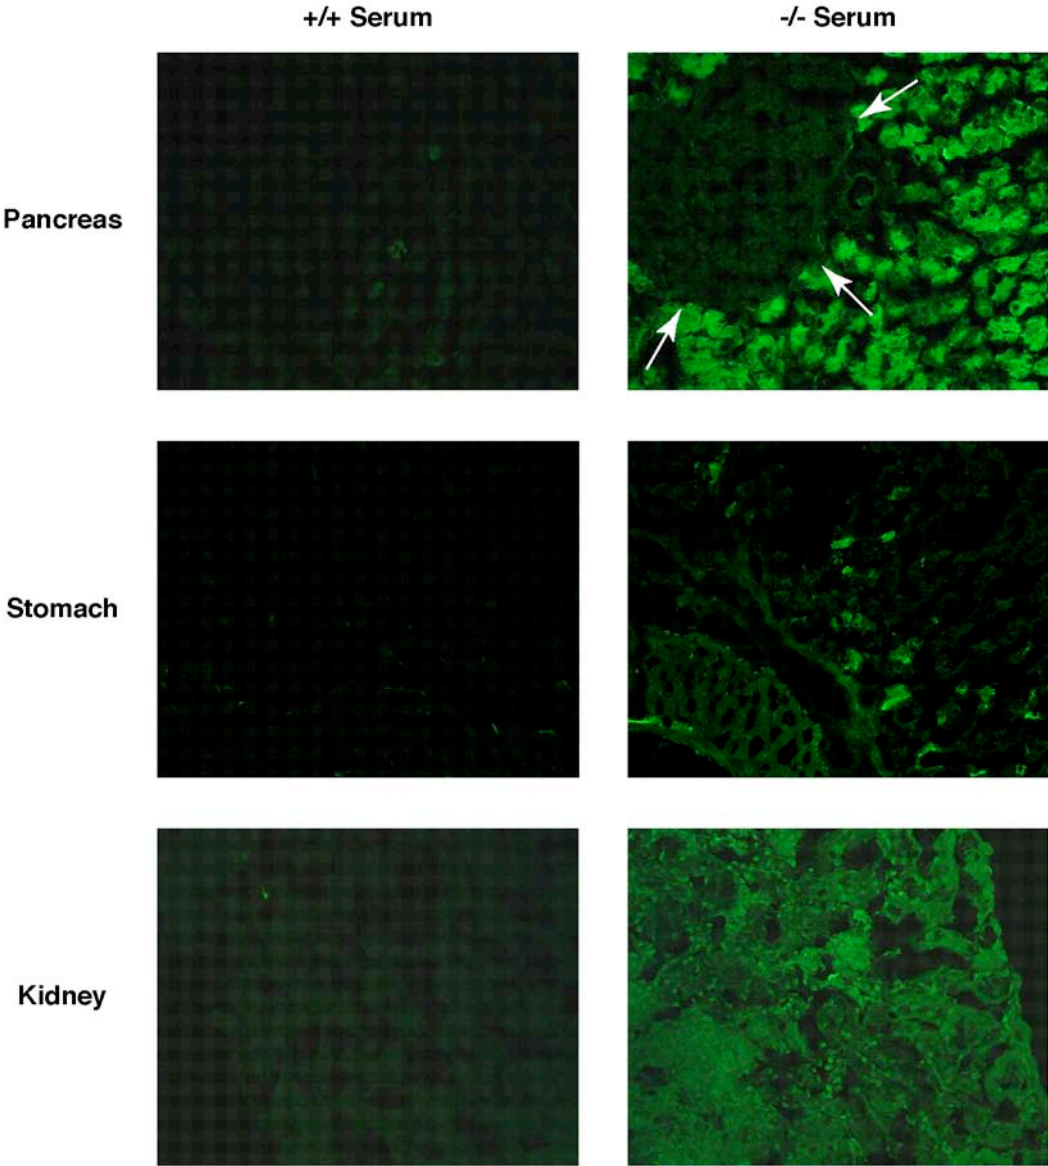

Supplemental Figure 4. Matsumoto M, et al

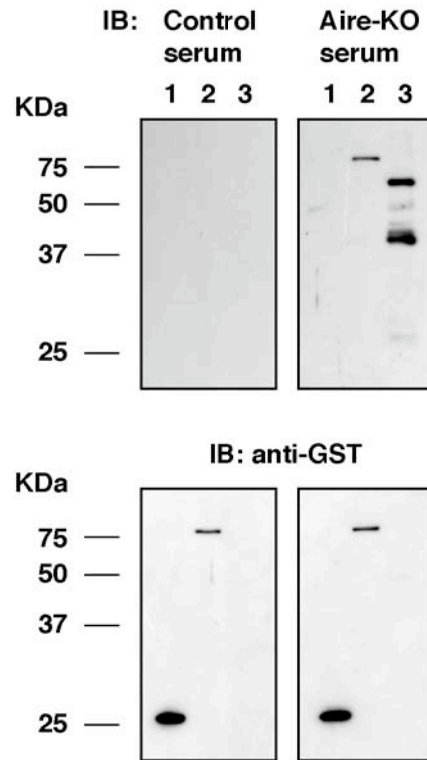



### Supplemental Data

Figure S1. Retained thymic structure in both Aire-sufficient and Aire-deficient NOD mice. (A) Thymic medulla, identified as ER-TR5<sup>+</sup> areas (stained in red), contained normal numbers and distribution of UEA-1<sup>+</sup> cells (stained in green) in both Aire-sufficient and Aire-deficient NOD mice. Original magnification, x 200. (B) Aire<sup>+</sup> cells were normally distributed within the medullary TECs in NOD mice. The subcellular distribution of Aire nuclear-dots within the cell was also unaltered. Aire-deficient NOD thymus served as a negative control for staining with anti-Aire Ab. Original magnification, x 400.

Figure S2. Lymphoid cell infiltration in the pancreas from Aire-deficient NOD mice. (A) Both CD4<sup>+</sup> and CD8<sup>+</sup> cells infiltrated in the pancreas from Aire-deficient NOD mice. (B) B220<sup>+</sup> cells, which do not express CD138, were recognized in the pancreas from Aire-deficient NOD mice (upper panels). Clusters of CD138<sup>+</sup> cells, which are B220<sup>low</sup>, were also identified among these lymphoid cell infiltrations (lower panels). Original magnification, x 200.

Figure S3. Auto-Ab production in Aire-deficient NOD mice. Serum from Aire-deficient NOD mice, but not from control littermates, contained IgG class auto-Abs against pancreas, stomach and kidney as detected with immunofluorescence. Arrows in the upper right panel indicate a  $\beta$ -cell islet. Original magnification, x 200.

Figure S4. Production of anti-PDIp auto-Ab in Aire-deficient NOD mice. Aire-deficient NOD mouse serum (top right), but not control mouse serum (top left), showed reactivity against bacterially expressed GST-PDIp fusion protein (lane 2), but not against GST alone (lane 1), by Western blot analysis. Protein extracted from pancreas was used as a positive control (lane 3). The same blot was probed with anti-GST Ab (bottom).
